# Supplementary material for: Estrogen receptor—positive breast cancer survival prediction and analysis of resistance–related genes introduction
Source: PeerJ. 2021 Oct 26;9:e12202. doi: 10.7717/peerj.12202 (PMC8555508; doi:10.7717/peerj.12202)
Supplement: Supplemental Information 4 [file peerj-09-12202-s004.xls]

## Sheet: Abbreviations
AIC	Akaike information criterion
AUC	Area under the curve
C-index	concordance index
DEGs	differentially expressed genes
DFS	disease-free survival
DMFS	distant metastases-free survival
ER	estrogen receptor
GEO	Gene Expression Omnibus
HER2	Human epidermal growth factor receptor 2
IDC	invasive ductal carcinoma
ILC	invasive lobular carcinoma
PR	progesterone receptor
RFS	relapse-free survival
ROC	Receiver operating characteristic curve
TCGA	The Cancer Genome Atlas
