# Supplementary material for: Estrogen receptor—positive breast cancer survival prediction and analysis of resistance–related genes introduction
Source: PeerJ. 2021 Oct 26;9:e12202. doi: 10.7717/peerj.12202 (PMC8555508; doi:10.7717/peerj.12202)
Supplement: Supplemental Information 6 [file peerj-09-12202-s006.xls]

## Sheet: The list of 37DEGs
TIMP2
GEM
WLS
EMR1
HLA-J
HLA-B
HLA-C
SLC4A2
KCTD12
PSMB8
EPHX1
SNAI2
BSG
LGALS3BP
IGFBP3
PSMB9
SLC27A6
SLC24A3
PDZK1
SCUBE2
AMIGO2
TFF1
C6orf211
AREG
MGP
CSTA
SERPINA3
RAB31
ABCG1
MPPED2
IGF1R
CXCL12
TFF3
GREB1
PGR
NPY1R
GFRA1
